# Supplementary material
Source: HighWire-hosted journal article supplement (https://jnm.snmjournals.org/highwire/filestream/93875/field_highwire_adjunct_files/0/jnm23754_appendix_A.pdf)
Supplement: jnm23754_appendix_A.pdf [file jnm23754_appendix_A.pdf]

## APPENDIX A

# S value [Gy/(MBq\*h)] for <sup>90</sup>Y locoregional treatment BAT regions

### cavity volume 0.5 ml

| radius of shell in BAT | geometry 1 hypotesis 1 | geometry 1 hypotesis 2 f=1 |
|------------------------|------------------------|----------------------------|
| 0.6                    | 1.64E-01               | 4.58E-01                   |
| 0.7                    | 6.98E-02               | 1.97E-01                   |
| 0.8                    | 2.93E-02               | 8.48E-02                   |
| 0.9                    | 1.15E-02               | 3.94E-02                   |
| 1                      | 4.05E-03               | 1.79E-02                   |
| 1.1                    | 1.27E-03               | 7.51E-03                   |
| 1.3                    | 1.96E-04               | 1.75E-03                   |
| 1.5                    | 1.06E-05               | 1.20E-04                   |
| 1.7                    | 4.36E-06               | 5.82E-06                   |
| 1.9                    | 3.08E-06               | 3.02E-06                   |

### cavity volume 4.2 ml

| radius of shell in BAT | geometry 1 hypotesis 1 | geometry 1 hypotesis 2 f=1 |
|------------------------|------------------------|----------------------------|
| 1.1                    | 1.67E-02               | 1.26E-01                   |
| 1.2                    | 7.52E-03               | 5.85E-02                   |
| 1.3                    | 3.37E-03               | 2.67E-02                   |
| 1.4                    | 1.44E-03               | 1.30E-02                   |
| 1.5                    | 5.63E-04               | 6.18E-03                   |
| 1.6                    | 1.92E-04               | 2.68E-03                   |
| 1.7                    | 5.63E-05               | 1.02E-03                   |
| 1.8                    | 1.48E-05               | 3.25E-04                   |

### cavity volume 7.2 ml

| radius of shell in BAT | geometry 1 hypotesis 1 | geometry 1 hypotesis 2 f=1 | geometry 2 d = 2 mm | geometry 2 d = 3 mm | geometry 2 d = 4 mm | geometry 2 d = 5 mm | geometry 2 d = 6 mm |
|------------------------|------------------------|----------------------------|---------------------|---------------------|---------------------|---------------------|---------------------|
| 1.3                    | 9.34E-03               | 8.86E-02                   | 6.59E-02            | 5.05E-02            | 4.03E-02            | 3.32E-02            | 2.80E-02            |
| 1.4                    | 4.26E-03               | 4.22E-02                   | 5.90E-02            | 5.17E-02            | 4.30E-02            | 3.61E-02            | 3.07E-02            |
| 1.5                    | 1.96E-03               | 1.94E-02                   | 2.79E-02            | 4.05E-02            | 3.84E-02            | 3.37E-02            | 2.93E-02            |
| 1.6                    | 8.43E-04               | 9.56E-03                   | 1.32E-02            | 1.93E-02            | 2.89E-02            | 2.88E-02            | 2.61E-02            |
| 1.7                    | 3.37E-04               | 4.54E-03                   | 6.43E-03            | 9.18E-03            | 1.38E-02            | 2.12E-02            | 2.19E-02            |
| 1.8                    | 1.18E-04               | 1.99E-03                   | 2.99E-03            | 4.42E-03            | 6.55E-03            | 1.02E-02            | 1.60E-02            |
| 2                      | 2.19E-05               | 4.92E-04                   | 8.39E-04            | 1.38E-03            | 2.21E-03            | 3.47E-03            | 5.53E-03            |
| 2.2                    | 2.86E-06               | 3.63E-05                   | 8.61E-05            | 1.86E-04            | 3.71E-04            | 6.92E-04            | 1.21E-03            |
| 2.4                    | 1.80E-06               | 2.62E-06                   | 4.61E-06            | 1.31E-05            | 3.56E-05            | 9.08E-05            | 2.03E-04            |
| 2.6                    | 1.48E-06               | 1.62E-06                   | 1.71E-06            | 1.78E-06            | 2.79E-06            | 6.77E-06            | 2.02E-05            |

### cavity volume 14.1 ml

| radius of shell in BAT | geometry 1 hypotesis 1 | geometry 1 hypotesis 2 f=1 |
|------------------------|------------------------|----------------------------|
| 1.6                    | 4.67E-03               | 3.21E-02                   |
| 1.7                    | 2.16E-03               | 1.49E-02                   |
| 1.8                    | 1.01E-03               | 7.38E-03                   |
| 1.9                    | 4.44E-04               | 3.55E-03                   |
| 2                      | 1.79E-04               | 1.56E-03                   |
| 2.1                    | 6.42E-05               | 6.06E-04                   |
| 2.3                    | 1.27E-05               | 1.19E-04                   |
| 2.5                    | 2.08E-06               | 6.49E-06                   |
| 2.7                    | 1.38E-06               | 1.59E-06                   |
| 2.9                    | 1.23E-06               | 1.26E-06                   |

### cavity volume 33.5 ml

| radius of shell in BAT | geometry 1 hypotesis 1 | geometry 1 hypotesis 2 f=1 |
|------------------------|------------------------|----------------------------|
| 2.1                    | 1.93E-03               | 1.80E-02                   |
| 2.2                    | 9.07E-04               | 8.49E-03                   |
| 2.3                    | 4.30E-04               | 4.28E-03                   |
| 2.4                    | 1.93E-04               | 2.08E-03                   |
| 2.5                    | 7.84E-05               | 9.25E-04                   |
| 2.6                    | 2.76E-05               | 3.63E-04                   |
| 2.8                    | 6.00E-06               | 7.40E-05                   |
| 3                      | 1.27E-06               | 3.97E-06                   |
| 3.2                    | 9.16E-07               | 1.06E-06                   |
| 3.4                    | 7.97E-07               | 9.28E-07                   |

### cavity volume 65.4 ml

| radius of shell in BAT | geometry 1 hypotesis 1 | geometry 1 hypotesis 2 f=1 |
|------------------------|------------------------|----------------------------|
| 2.6                    | 9.70E-04               | 1.16E-02                   |
| 2.7                    | 4.60E-04               | 5.48E-03                   |
| 2.8                    | 2.19E-04               | 2.79E-03                   |
| 2.9                    | 9.90E-05               | 1.36E-03                   |
| 3                      | 4.06E-05               | 6.12E-04                   |
| 3.1                    | 1.50E-05               | 2.41E-04                   |
| 3.2                    | 7.14E-06               | 1.03E-04                   |
| 3.4                    | 8.73E-07               | 3.06E-06                   |
| 3.6                    | 7.04E-07               | 8.33E-07                   |
| 3.8                    | 5.71E-07               | 6.84E-07                   |
